# Supplementary material for: Kinetic Analysis of Label-Free Microscale Collagen Gel Contraction Using Machine Learning-Aided Image Analysis
Source: Front Bioeng Biotechnol. 2020 Sep 22;8:582602. doi: 10.3389/fbioe.2020.582602 (PMC7537788; doi:10.3389/fbioe.2020.582602)
Supplement: Supplementary file 1 [file Data_Sheet_1.ZIP › WekaSegmentPhaseCollagen_1.0.1.py]

# Macro to perform Weka segmentation on collagen gel contraction assays.
# Written by Cameron Yamanishi, Georgia Institute of Technology
# Version 1.0.0 September 13, 2018

# Algorithm takes 10x phase contrast images of ATPS collagen microgels
# from Incucyte 2018A.# From 1.0.0, change minimum particle size in particle analyzer from 10,000 to 100,000 to reduce the number of false 2 image hits.
# TIF image files should be saved into one folder.
# Image file names follow: experiment_well_channel_time.tif
# Metadata is retrieved as text, separated by underscores.

import os
from java.io import File
import time
import profile
from ij import IJ
from ij.io import OpenDialog, SaveDialog, DirectoryChooser
from ij.gui import GenericDialog
from ij import WindowManager
from ij.measure import Measurements, ResultsTable
from ij.plugin.filter import ParticleAnalyzer
import trainableSegmentation.WekaSegmentation as WekaSegmentation
import trainableSegmentation.utils.Utils
 
def batch_find_images(path, file_type=None, name_filter=None, recursive=False):
    '''Open all files in the given folder.
    :param path: The path from were to open the images. String and java.io.File are allowed.
    :param file_type: Only accept files with the given extension (default: None).
    :param name_filter: Only accept files that contain the given string (default: None).
    :param recursive: Process directories recursively (default: False).
    '''
    # Converting a File object to a string.
    if isinstance(path, File):
        path = path.getAbsolutePath()
 
    def check_type(string):
        '''This function is used to check the file type.
        It is possible to use a single string or a list/tuple of strings as filter.
        This function can access the variables of the surrounding function.
        :param string: The filename to perform the check on.
        '''
        if file_type:
            # The first branch is used if file_type is a list or a tuple.
            if isinstance(file_type, (list, tuple)):
                for file_type_ in file_type:
                    if string.endswith(file_type_):
                        # Exit the function with True.
                        return True
                    else:
                        # Next iteration of the for loop.
                        continue
            # The second branch is used if file_type is a string.
            elif isinstance(file_type, string):
                if string.endswith(file_type):
                    return True
                else:
                    return False
            return False
        # Accept all files if file_type is None.
        else:
            return True
 
    def check_filter(string):
        '''This function is used to check for a given filter.
        It is possible to use a single string or a list/tuple of strings as filter.
        This function can access the variables of the surrounding function.
        :param string: The filename to perform the filtering on.
        '''
        if name_filter:
            # The first branch is used if name_filter is a list or a tuple.
            if isinstance(name_filter, (list, tuple)):
                for name_filter_ in name_filter:
                    if name_filter_ in string:
                        # Exit the function with True.
                        return True
                    else:
                        # Next iteration of the for loop.
                        continue
            # The second branch is used if name_filter is a string.
            elif isinstance(name_filter, string):
                if name_filter in string:
                    return True
                else:
                    return False
            return False
        else:
        # Accept all files if name_filter is None.
            return True
 
    # We collect all files to open in a list.
    path_to_images = []
    # Replacing some abbreviations (e.g. $HOME on Linux).
    path = os.path.expanduser(path)
    path = os.path.expandvars(path)
    # If we don't want a recursive search, we can use os.listdir().
    if not recursive:
        for file_name in os.listdir(path):
            full_path = os.path.join(path, file_name)
            if os.path.isfile(full_path):
                if check_type(file_name):
                    if check_filter(file_name):
                        path_to_images.append(full_path)
    # For a recursive search os.walk() is used.
    else:
        # os.walk() is iterable.
        # Each iteration of the for loop processes a different directory.
        # the first return value represents the current directory.
        # The second return value is a list of included directories.
        # The third return value is a list of included files.
        for directory, dir_names, file_names in os.walk(path):
            # We are only interested in files.
            for file_name in file_names:
                # The list contains only the file names.
                # The full path needs to be reconstructed.
                full_path = os.path.join(directory, file_name)
                # Both checks are performed to filter the files.
                if check_type(file_name):
                    if check_filter(file_name):
                        # Add the file to the list of images to open.
                        path_to_images.append(full_path)
    return path_to_images
 
def split_string(input_string):
    '''Split a string to a list and strip it
    :param input_string: A string that contains semicolons as separators.
    '''
    string_splitted = input_string.split(';')
    # Remove whitespace at the beginning and end of each string
    strings_stripped = [string.strip() for string in string_splitted]
    return strings_stripped

def analyze_images(image_list, segmentator, underscores):
	# Prepare analysis tools
	if segmentator is None:# Check if segmentator was loaded.
		print('Segmentator not found')
		return
	counter = 0
	result_list = ResultsTable()
	for img_path in image_list: # Cycle through image files
		imp = IJ.openImage(img_path)
		if imp: # Check that an image was loaded
			image_name = imp.getShortTitle() # Get image name and associated data
			ip = imp.getProcessor()
			ip2 = ip.resize(704, 520)
			imp.setProcessor(imp.getTitle(), ip2)
			#experiment = image_name.split('_')[0]
			well = image_name.split('_')[underscores]
			#channel = image_name.split('_')[2]
			elapsed = image_name.split('_')[underscores+2]
			table = ResultsTable() # Declare/clear results table
			pa = ParticleAnalyzer(
				ParticleAnalyzer.INCLUDE_HOLES, 
				Measurements.AREA, table, 
				100000, float('inf'), 
				0.0, 1.0) # Set parameters for particle analyzer. Maybe move out of loop
			pa.setHideOutputImage(True)
			weka = segmentator.applyClassifier(imp, 0, 0) # Apply classifier to image
			ip = weka.getProcessor().duplicate()
			ip.setThreshold(1, 1, 1)
			weka.setProcessor(imp.getShortTitle(), ip)
			if pa.analyze(weka):
				print('good', imp.getShortTitle())
			else:
				print('Error in analyzing thresholded image', imp.getShortTitle())
			areas = table.getColumn(0)
			if areas:
				if len(areas) == 1:
					area = areas[0]
					#weka.show()
				else:
					area = max(areas)
					print('Error: {} areas detected'.format(len(areas)), imp.getShortTitle())
					#weka.show()
			else:
				print('No areas found', imp.getShortTitle())
				area = 0
			#print counter, well, elapsed, area
			result_list.setValue('Well', counter, well)
			result_list.setValue('Elapsed', counter, elapsed)
			result_list.setValue('Area', counter, area)
			counter = counter + 1
		imp.flush()
	result_list.show('Results')
	return result_list

def getOptions():
	gd = GenericDialog('Options')
	gd.addChoice('Weka Segmentation Classifier', ['Train new', 'Load classifier'],'Load classifier')
	gd.addNumericField('How many underscores before well ID', 1, 1)
	gd.showDialog()
	if gd.wasCanceled():
		print('User canceled dialog')
		return
	train = gd.getNextChoice()
	underscores = gd.getNextNumber()
	return [train, underscores]

def getDirectory(title):
	dc = DirectoryChooser(title)
	path = dc.getDirectory()
	if path is None:
		print('User canceled the dialog.')
		return
	else:
		
		return path
		
def getFile(title):
	dc = OpenDialog(title)
	path = dc.getDirectory()
	if path is None:
		print('User canceled the dialog.')
		return
	else:
		fileName = dc.getFileName()
		filePath = '%s%s' % (path, fileName)
		return filePath
	
def run_script():
	import_dir = getDirectory('Locate the folder containing image files')
	if import_dir is None:
		print('User canceled the dialog.')
	else:
		[train, underscores] = getOptions()
		underscores = int(underscores)
		if train == 'Train new':
			print('Train new is still in beta. Run segementation using regular FIJI and save the classifier.')
			'''
			train_file = getFile('Locate the image to use for training.')
			train_imp = IJ.openImage(train_file)
			train_imp.show()
			IJ.run('Trainable Weka Segmentation')
			classifier = WekaSegmentation(train_imp)
			classifier.createTrainingInstances()
			'''
		elif train == 'Load classifier':
			train_file = getFile('Locate the classifier file. Close this window to run a new training set.')
			classifier = WekaSegmentation()
			classifier.loadClassifier(train_file)
		else:
			print('Error. No training classifier found.')
			return
		#print(classifier)
		print('Running Weka Segmentation on images in %s' % (import_dir))
		start = time.time()
		file_types = '.tif'
		filters = ''
		do_recursive = False
		path_to_images = batch_find_images(
	    	import_dir,
	        split_string(file_types),
	        split_string(filters),
	        do_recursive
	        )
        results = analyze_images(path_to_images, classifier, underscores)
        end = time.time()
        print('time', end-start, 's')
        sd = SaveDialog('Save area results', 'Results', '.csv')
        save_file = '%s%s' % (sd.getDirectory(), sd.getFileName())
        results.saveAs(save_file)
         
if __name__ in ['__builtin__','__main__']:
	run_script()


        
